# Supplementary material for: LIS1 determines cleavage plane positioning by regulating actomyosin-mediated cell membrane contractility
Source: eLife journal article supplement (doi:10.7554/elife.51512), 2020-03-11
Supplement: supp [file elife-51512-supp-v1.zip]

Archive with 17 entries (17 files):
- elife_poa_e51512_Video_3.mov
- elife_poa_e51512_Video_5.mov
- elife_poa_e51512_Video_6.mov
- elife_poa_e51512_Figure_4_source_data_1.docx
- elife_poa_e51512_Figure_8_source_data_1.docx
- elife_poa_e51512_Figure_2_source_data_1.docx
- elife_poa_e51512_Figure_11_source_data_1.docx
- elife_poa_e51512_Figure_5_source_data_1.docx
- elife_poa_e51512_Video_1.mov
- elife_poa_e51512_Video_4.mov
- elife_poa_e51512_Figure_6_source_data_1.docx
- elife_poa_e51512_Figure_1_source_data_1.docx
- elife_poa_e51512_Transparent_Reporting_File.pdf
- elife_poa_e51512_Figure_3_source_data_1.docx
- elife_poa_e51512_Video_2.mov
- elife_poa_e51512_Figure_10_source_data_1.docx
- elife_poa_e51512_Video_7.mov
