# Supplementary material for: LIS1 determines cleavage plane positioning by regulating actomyosin-mediated cell membrane contractility
Source: eLife journal article supplement (doi:10.7554/elife.51512), 2020-03-11
Supplement: supp [file elife-51512-supp-v1.zip › elife_poa_e51512_Figure_2_source_data_1.docx]

**Figure 2 – Source Data 1.** Quantification of apical NPCs (RGs)

|  | **Vertical cleavage plane**  (vertical mitotic spindle) | **Oblique cleavage plane**  (oblique mitotic spindle) |
| --- | --- | --- |
| ***Pafah1b1hc/+*** (n=25) | 21 (84%) | 4 (16%) |
| ***GFAP-Cre; Pafah1b1hc/+*** (n=25) | 11 (44%) | 14 (56%) |

n: total number of apical NPCs observed in the immunohistochemistry experiments
