# Supplementary material for: LIS1 determines cleavage plane positioning by regulating actomyosin-mediated cell membrane contractility
Source: eLife journal article supplement (doi:10.7554/elife.51512), 2020-03-11
Supplement: supp [file elife-51512-supp-v1.zip › elife_poa_e51512_Figure_3_source_data_1.docx]

**Figure 3 – Source Data 1.** Quantification of aPKC inheritance in apical NPCs (RGs)

|  | ***Pafah1b1hc/+*** (n=27) | ***Pafah1b1hc/ko***(n=32) |
| --- | --- | --- |
| **Equal inheritance** | 60.9% | 31.2% |
| **Unequal inheritance** | 39.1% | 68.8% |

n: total number of apical NPCs observed in the immunohistochemistry experiments
