# Supplementary material for: LIS1 determines cleavage plane positioning by regulating actomyosin-mediated cell membrane contractility
Source: eLife journal article supplement (doi:10.7554/elife.51512), 2020-03-11
Supplement: supp [file elife-51512-supp-v1.zip › elife_poa_e51512_Figure_5_source_data_1.docx]

**Figure 5 – Source Data 1.** Quantification of MEFs

| **C. Hyper-contractility**  **phenotypes** | ***Pafah1b1+/+***  (N=4)  3.6± 3.6% | ***Pafah1b1hc/ko***  (N=5)  56.2± 8.4% | **Student’s *t*-test**  ***p*-value** (*******p*=0.0011) |
| --- | --- | --- | --- |
| **E. Hyper-contractility**  **phenotypes** | ***CAGG-CreERT2; Pafah1b1+/+***  (N=3)  13.5 ± 2.4% | ***CAGG-CreERT2; Pafah1b1hc/hc*** (N=4)  40.5 ± 8.4% | (*******p*=0.0446) |

N: total number of independent experimental sets performed for the time lapse live-cell imaging experiments of MEFs, total mitotic events were monitored; *Pafah1b1+/+*(96), *Pafah1b1hc/ko* (36), *CAGG-CreERT2; Pafah1b1+/+* (20), *CAGG-CreERT2; Pafah1b1hc/hc*(27)
