# Supplementary material for: LIS1 determines cleavage plane positioning by regulating actomyosin-mediated cell membrane contractility
Source: eLife journal article supplement (doi:10.7554/elife.51512), 2020-03-11
Supplement: supp [file elife-51512-supp-v1.zip › elife_poa_e51512_Figure_6_source_data_1.docx]

**Figure 6 – Source Data 1.** Quantification of MEFs

| **E. Anillin Distribution** | ***Pafah1b1hc/+*** (n=65) | ***Pafah1b1hc/ko*** (n=48) |
| --- | --- | --- |
| **normal** | 72.3% | 27.1% |
| **asymmetric** | 10.8% | 14.6% |
| **dispersed** | 15.4% | 41.7% |
| **central MT** | 1.5% | 16.6% |

n: total number of MEFs observed in the immunocytochemistry experiments
