# Supplementary material for: LIS1 determines cleavage plane positioning by regulating actomyosin-mediated cell membrane contractility
Source: eLife journal article supplement (doi:10.7554/elife.51512), 2020-03-11
Supplement: supp [file elife-51512-supp-v1.zip › elife_poa_e51512_Figure_8_source_data_1.docx]

**Figure 8 – Source Data 1.** Quantification of MEFs

| **E. Actomyosin Distribution** | ***Pafah1b1hc/+*** (N=6) | ***Pafah1b1hc/ko*** (N=4) |
| --- | --- | --- |
| **normal** | 73% | 30% |
| **dispersed** | 27% | 70% |

N: total number of MEF immunocytochemistry experimental sets used for examining Actomysoin distribution. Total fifty cells were counted from all experimentsz
