# Supplementary material for: LIS1 determines cleavage plane positioning by regulating actomyosin-mediated cell membrane contractility
Source: eLife journal article supplement (doi:10.7554/elife.51512), 2020-03-11
Supplement: supp [file elife-51512-supp-v1.zip › elife_poa_e51512_Figure_10_source_data_1.docx]

**Figure 10 – Source Data 1.** Quantification of MEFs

| **C. SEPT6-GFP**  **Cytokinetic Failure** | ***CAGG-CreERT2; Pafah1b1+/+*** (n=7)  1 (14.3%) | ***CAGG-CreERT2; Pafah1b1hc/hc***(n=6)  4 (66.7%) |
| --- | --- | --- |

n: total number of MEFs observed in live-cell imaging of SEPT6-GFP during cytokinesis
