# Supplementary material for: LIS1 determines cleavage plane positioning by regulating actomyosin-mediated cell membrane contractility
Source: eLife journal article supplement (doi:10.7554/elife.51512), 2020-03-11
Supplement: supp [file elife-51512-supp-v1.zip › elife_poa_e51512_Figure_11_source_data_1.docx]

**Figure 11 – source data 1.** Quantification of MEFs

| **E. Anillin Distribution** | ***Pafah1b1+/+***  **+ GFP**  (n=23) | ***Pafah1b1+/+***  **+ CA-RhoA**  **-GFP**  (n=20) | ***Pafah1b1hc/ko***  **+ GFP**  (n=24) | ***Pafah1b1hc/ko***  **+ DN-RhoA**  **-GFP**  (n=24) |
| --- | --- | --- | --- | --- |
| **normal** | 78.3% | 22% | 25% | 70.8% |
| **asymmetric** | 8.7% | 22% | 33.3% | 12.5% |
| **dispersed** | 13.0% | 56% | 33.3% | 16.7% |
| **central MT** | 0% | 0% | 8.3% | 0% |

n: total number of MEFs observed in immunocytochemistry to detect Anillin distribution
